# Supplementary material
Source: Springer Nature journal article supplement (https://www.springermedizin.de/resource/supplementary/12889_2012_6340_MOESM2_ESM.pdf/9499550)

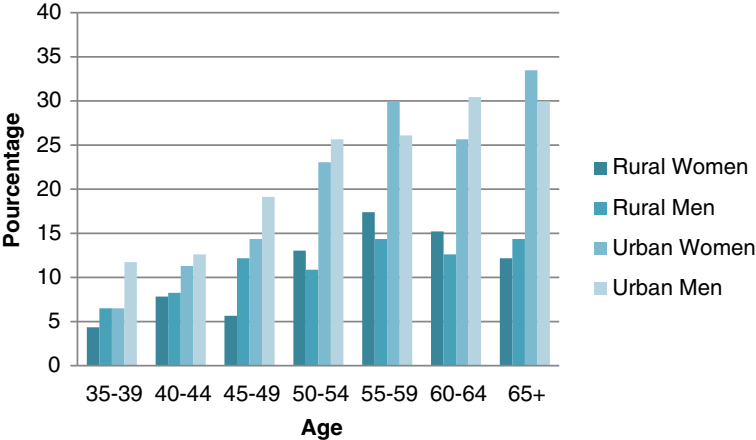

Supplement: MOESM2 [file 9499550]
